# Supplementary material
Source: Springer Nature journal article supplement (https://www.springermedizin.de/resource/supplementary/12911_2012_510_MOESM2_ESM.pdf/9526050)
Supplement: MOESM2 [file 9526050]

Chronic Disease Care

► Current Status

► New Results & Actions

ⓘ ⓘ Patient / Provider Recommendations

| Notes | Result                 | Date            | Interview                                            | Fill in new results    | Date (y-m-d) | Note (optional) |
|-------|------------------------|-----------------|------------------------------------------------------|------------------------|--------------|-----------------|
|       | No result ---          | No info ----- ⓘ | SMBG recommended                                     |                        |              |                 |
|       |                        | No info -----   | Home glucose <span style="float:right">Cancel</span> |                        |              |                 |
|       | usual low: usual high: |                 | Fasting                                              | usual low: usual high: |              |                 |
|       | usual low: usual high: |                 | Post breakfast                                       | usual low: usual high: |              |                 |
|       | usual low: usual high: |                 | Lunch                                                | usual low: usual high: |              |                 |
|       | usual low: usual high: |                 | Post lunch                                           | usual low: usual high: |              |                 |
|       | usual low: usual high: |                 | Dinner                                               | usual low: usual high: |              |                 |
|       | usual low: usual high: |                 | Post dinner                                          | usual low: usual high: |              |                 |
|       | usual low: usual high: |                 | Bedtime                                              | usual low: usual high: |              |                 |

|               |                   |                                |  |
|---------------|-------------------|--------------------------------|--|
| No result --- | No info ----- ⓘ   | Home glucose freq.             |  |
| No result --- | No info ----- ⓘ   | Glucose control                |  |
| No result --- | No info ----- ⓘ ⓘ | Severe "hypos"                 |  |
| No result --- | No info ----- ⓘ ⓘ | Non-severe "hypos" (per month) |  |
| No result --- | No info -----     | Seeing: cardiologist           |  |
| No result --- | No info -----     | Angina                         |  |
| No result --- | No info -----     | CV event since last visit      |  |
| No result --- | No info -----     | Claudication                   |  |
| No result --- | No info -----     | Seeing: foot specialist        |  |
| No result --- | No info -----     | Foot discomfort                |  |
| No result --- | No info ----- ⓘ ⓘ | Eye specialist (when)          |  |
| No result --- | No info -----     | Retinal intervention           |  |
| No result --- | No info -----     | Cataract extraction            |  |
| No result --- | No info -----     | Seeing: nephrologist           |  |
| No result --- | No info ----- ⓘ ⓘ | Seeing: dietitian              |  |
| No result --- | No info -----     | Seeing: kinesiologist          |  |
| No result --- | No info -----     | Seeing: other HCP              |  |
| No result --- | No info ----- ⓘ ⓘ | Smoking now                    |  |
| No result --- | No info ----- ⓘ ⓘ | Exercise (avg min/wk)          |  |

| Notes | Result        | Date              | Physical Exam            | Fill in new results | Date (y-m-d) | Note (optional) |
|-------|---------------|-------------------|--------------------------|---------------------|--------------|-----------------|
|       | No result --- | No info ----- ⓘ ⓘ | BP sitting (mm Hg)       |                     |              |                 |
|       | No result --- | No info -----     | BP standing (mm Hg)      |                     |              |                 |
|       | No result --- | No info ----- ⓘ   | Orthostatic drop (DBP)   |                     |              |                 |
|       | No result --- | No info -----     | Height (cm)              |                     |              |                 |
|       | No result --- | No info -----     | Weight (kg)              |                     |              |                 |
|       | No result --- | No info ----- ⓘ ⓘ | BMI (kg/m <sup>2</sup> ) |                     |              |                 |
|       | No result --- | No info -----     | Waist circumf. (cm)      |                     |              |                 |
|       | No result --- | No info -----     | Retina: undilated eye    |                     |              |                 |
|       | No result --- | No info -----     | Injection sites          |                     |              |                 |
|       | No result --- | No info ----- ⓘ   | Feet: perfusion          |                     |              |                 |
|       | No result --- | No info ----- ⓘ   | Feet: light touch sense  |                     |              |                 |
|       | No result --- | No info ----- ⓘ   | Feet: vibration sense    |                     |              |                 |
|       | No result --- | No info ----- ⓘ   | Feet: skin integrity     |                     |              |                 |
|       | No result --- | No info ----- ⓘ   | Feet: infection          |                     |              |                 |

| Notes  | Result        | Date              | Lab Tests                                           | Fill in new results | Date (y-m-d) | Note (optional) |
|--------|---------------|-------------------|-----------------------------------------------------|---------------------|--------------|-----------------|
| • HHSC | Borderline    | 0.073 2010-Apr-12 | ⓘ ⓘ A1C (fraction)                                  |                     |              |                 |
| • HHSC | Borderline    | 2.29 2010-Aug-09  | ⓘ ⓘ LDL (mmol/L)                                    |                     |              |                 |
| • HHSC | Normal        | 1.23 2010-Aug-09  | TG (mmol/L)                                         |                     |              |                 |
| • HHSC | Normal        | 1.03 2010-Aug-09  | HDL (mmol/L)                                        |                     |              |                 |
| • HHSC | Normal        | 3.8 2010-Aug-09   | ⓘ TC/HDL (ratio)                                    |                     |              |                 |
|        | No result --- | No info -----     | Vitamin B12 (pmol/L)                                |                     |              |                 |
| • HHSC | Borderline    | 127 2010-Aug-09   | ⓘ Creatinine (µmol/L)                               |                     |              |                 |
|        | No result --- | No info -----     | eGFR (mL/min/1.73m <sup>2</sup> )                   |                     |              |                 |
|        | No result --- | No info ----- ⓘ ⓘ | ⓘ ⓘ ACR (mg/mmol)                                   |                     |              |                 |
|        | No result --- | No info -----     | TSH (mIU/L)                                         |                     |              |                 |
|        | No result --- | No info -----     | Insulin                                             |                     |              |                 |
|        | No result --- | No info -----     | C-peptide                                           |                     |              |                 |
| • HHSC | High          | 40 2010-Aug-09    | ALT (IU/L)                                          |                     |              |                 |
|        |               | No info -----     | Other tests <span style="float:right">Cancel</span> |                     |              |                 |

| Lab test name | Result | Lab test name | Result |
|---------------|--------|---------------|--------|
|               |        |               |        |
|               |        |               |        |
|               |        |               |        |
